# Supplementary material for: Plant dominance in a subalpine montane meadow: biotic vs. abiotic controls of subordinate diversity within and across sites
Source: PeerJ. 2018 Sep 21;6:e5619. doi: 10.7717/peerj.5619 (PMC6152469; doi:10.7717/peerj.5619)
Supplement: Data S1 — Data for the field study [file peerj-06-5619-s002.xlsx]

## Sheet: Sheet1
Plot	Treatment	NH4-N 2014	NO3-N 2014	Total N 2014	Average Below PAR 2014	LAI 2014	2013 Richness	2013 Total Cover	2013 Evenness	2013 Diversity	June 2014 Richness	June 2014 Total Cover	June 2014 Evenness	June 2014 Diversity	July 2014 Richness	July 2014 Total Cover	July 2014 Evenness	July 2014 Diversity	2015 Richness	2015 Total Cover	2015 Evneness	2015 Diversity	2014 Efflux	Richness 2016	Total Cover 2016	Evenness 2016	Diversity 2016
1	Control				1417	0.43	12	125	0.832656	2.06907	16	169	0.907647	2.51653	16	172	0.90977	2.52242	15	187	0.909433	2.46279	2.37759	15	192	0.890252	2.41085
2	Control	2.297	0.3007	2.5977	1888.6	0.15	6	104	0.880635	1.57789	14	158	0.871861	2.30089	17	121	0.926057	2.62372	15	219	0.935524	2.53345	2.34095	14	187	0.92775	2.44838
3	Control	0.3738	0.2665	0.6403	1681.3	0.58	7	100	0.858195	1.66997	14	151	0.850109	2.24349	14	136	0.906095	2.39124	13	215	0.920107	2.36003	2.19668	15	179	0.915939	2.48041
4	Festuca Removal	0.3757	0.3034	0.6791	1918.4	0.21	8	96	0.681363	1.41685	15	158	0.820631	2.22231	16	151	0.900172	2.49581	8	135	0.861801	1.79206	2.19167	18	150	0.852569	2.46424
5	Control	0.5864	0.2851	0.8715	1655.1	0.46	8	122	0.859899	1.78811	13	184	0.860581	2.20735	15	166	0.871924	2.36121	11	194	0.847856	2.03307	2.38143	14	197	0.867957	2.29059
6	Control	0.6692	0.2908	0.96	1669.4	0.2	8	99	0.831626	1.72932	15	139	0.87194	2.36126	15	128	0.919972	2.49133	15	177	0.862488	2.33566	3.58016	15	181	0.880059	2.38325
7	Control	1.005	0.2888	1.2938	1663.4	0.35	11	130	0.775023	1.85842	15	173	0.894416	2.42212	13	129	0.919379	2.35816	15	160	0.850158	2.30227	1.53658	15	177	0.912594	2.47135
8	Potentilla Removal	2.325	0.2794	2.6044	1666.1	0.5	7	116	0.826894	1.60906	14	137	0.862563	2.27635	18	135	0.876534	2.53351	13	169	0.902218	2.31414	2.59539	18	167	0.875775	2.53132
9	Control	0.5441	0.2941	0.8382	1427.9	0.9	11	135	0.732735	1.75702	16	198	0.878159	2.43477	18	154	0.908568	2.6261	12	189	0.855712	2.12636	2.39332	18	173	0.838706	2.42417
10	Control	1.025	0.2688	1.2938	1807.8	0.28	10	146	0.820521	1.88932	17	184	0.879715	2.49242	15	163	0.798697	2.16291	11	184	0.790936	1.89658	2.86329	15	140	0.882812	2.3907
11	Festuca Removal	1.083	0.2903	1.3733	1944.6	0.16	12	124	0.855375	2.12553	16	147	0.887016	2.45933	18	155	0.88287	2.55182	12	179	0.894165	2.22192	1.99141	13	154	0.875214	2.24488
12	Festuca Removal	3.974	0.2818	4.2558	1955.4	0.14	10	126	0.838454	1.93061	13	143	0.882345	2.26317	13	133	0.89662	2.29979	14	222	0.907386	2.39464	2.41589	16	204	0.871755	2.41702
13	Potentilla Removal	0.9044	0.2929	1.1973	1316.1	0.67	10	173	0.812962	1.87191	13	194	0.816768	2.09497	14	164	0.9202	2.42846	12	170	0.897028	2.22903	2.79425	14	168	0.844881	2.22969
14	Potentilla Removal	0.4449	0.2958	0.7407	1692.4	0.43	10	108	0.7776	1.79049	12	152	0.876714	2.17855	13	170	0.944466	2.42251	13	189	0.845828	2.16951	1.99887	15	113	0.875728	2.37152
15	Control	0.6837	0.2758	0.9595	1563.8	0.56	12	118	0.778876	1.93543	13	157	0.881999	2.26228	14	146	0.881103	2.32528	10	160	0.893998	2.05851	2.52886	17	165	0.874382	2.47731
16	Festuca Removal	0.4811	0.2813	0.7624	1818.3	0.34	10	102	0.862281	1.98547	15	147	0.869031	2.35338	16	143	0.894383	2.47976	11	155	0.913686	2.19092	2.98598	16	128	0.819145	2.27115
17	Potentilla Removal	0.6546	0.2898	0.9444	1554.1	0.67	10	114	0.722255	1.66305	16	152	0.909087	2.52052	16	141	0.892205	2.47372	12	169	0.920631	2.28768	2.26757	16	147	0.907666	2.51658
18	Festuca Removal	4.231	0.3538	4.5848	1977.7	0.14	11	128	0.831831	1.99464	14	123	0.8587	2.26616	16	122	0.866167	2.40153	14	234	0.919034	2.42538	1.50026	18	150	0.856187	2.4747
19	Festuca Removal	0.5242	0.2971	0.8213	1887.1	0.21	8	108	0.82485	1.71523	13	130	0.879424	2.25568	12	138	0.937313	2.32913	15	176	0.92645	2.50887	1.99674	15	126	0.903649	2.44713
20	Festuca Removal	2.62	0.308	2.928	1837.2	0.3	8	117	0.832765	1.73169	15	149	0.897082	2.42934	13	143	0.89569	2.2974	13	201	0.805339	2.06565	2.14291	16	138	0.788684	2.1867
21	Potentilla Removal	0.4961	0.2968	0.7929	2016.5	0.14	12	122	0.846282	2.10293	15	136	0.820224	2.22121	16	166	0.869578	2.41098	14	154	0.901242	2.37843	1.27106	18	145	0.898009	2.59558
22	Potentilla Removal	6.912	0.2962	7.2082	1686.6	0.65	13	109	0.891308	2.28616	17	135	0.882689	2.50084	17	155	0.939611	2.66212	15	169	0.903259	2.44607	2.12188	18	138	0.826136	2.38784
23	Festuca Removal	0.6741	0.271	0.9451	2007.8	0.14	8	93	0.799804	1.66315	16	153	0.873463	2.42175	19	153	0.893934	2.63213	13	186	0.965613	2.47675	1.89076	16	110	0.897013	2.48705
24	Control	2.505	0.31	2.815	1663	0.56	14	111	0.842838	2.2243	13	169	0.956868	2.45432	15	166	0.863289	2.33783	13	191	0.793853	2.03619	1.76086	13	150	0.868078	2.22658
25	Festuca Removal				1898.6	0.3	12	143	0.839768	2.08675	13	145	0.884614	2.26899	14	152	0.836241	2.20689	13	202	0.912473	2.34045	2.50037	13	135	0.817644	2.09721
26	Control	0.5462	0.2905	0.8367	1947.1	0.31	11	110	0.803776	1.92737	15	154	0.931613	2.52286	13	146	0.911671	2.33839	11	166	0.896758	2.15033	2.15415	15	132	0.86499	2.34244
27	Potentilla Removal	34.16	0.4126	34.5726	1886	0.38	11	124	0.779443	1.86902	14	127	0.864787	2.28222	16	153	0.935876	2.5948	12	187	0.892658	2.21817	2.14329	14	149	0.897926	2.36968
28	Potentilla Removal	0.5353	0.2701	0.8054	1825.7	0.17	8	112	0.778598	1.61905	15	148	0.920021	2.49146	17	128	0.895541	2.53726	11	160	0.916859	2.19853	2.32072	15	128	0.879894	2.3828
29	Control	0.5478	0.2807	0.8285	1847.5	0.19	7	101	0.873556	1.69986	12	109	0.879425	2.18529	14	142	0.829401	2.18884	9	158	0.776239	1.70557	2.24695	10	98	0.861836	1.98445
30	Potentilla Removal	1.116	0.2901	1.4061	2041.6	0.19	15	113	0.874598	2.36845	16	138	0.910338	2.52399	19	163	0.917435	2.70133	12	164	0.934926	2.3232	4.25558	13	114	0.980316	2.51446
